# Supplementary material for: Hierarchically templated beads with tailored pore structure for phosphopeptide capture and phosphoproteomics
Source: Royal Society of Chemistry journal article supplement (doi:10.1039/c7ra00385d), 2017-01-01
Supplement: c7ra00385d1.pdf [file c7ra00385d1.pdf]

## Supporting Information

### **Hierarchically templated beads with tailored pore structure for phosphopeptide capture and phosphoproteomics**

Celina Wierzbicka<sup>a</sup>, Silje B. Torsetnes<sup>b</sup>, Ole N. Jensen<sup>b</sup>, Sudhirkumar Shinde<sup>a</sup> and Börje  
Sellergren<sup>a</sup>

<sup>a</sup>Department of Biomedical Sciences, Faculty of Health and Society, Malmö University, SE 205  
06 Malmö, Sweden

<sup>b</sup>Department of Biochemistry and Molecular Biology and VILLUM Center for Bioanalytical  
Sciences, University of Southern Denmark, DK-5230 Odense M, Denmark

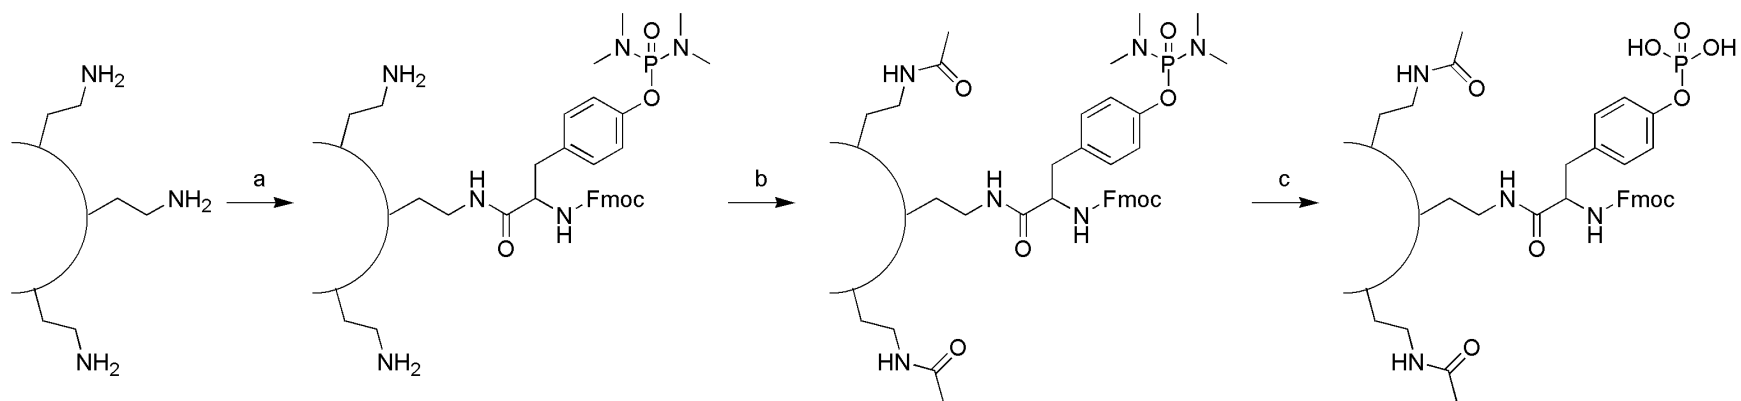

Figure S1. Template immobilization on silica surface, (a) PyBOP, HOBt, DIEA, Fmoc-Tyr(PO(NMe<sub>2</sub>)<sub>2</sub>)-OH, DMF, room temperature, 24 h; (b) Ac<sub>2</sub>O, DMF, 2 h; (c) TFA/H<sub>2</sub>O 9/1 (v/v), room temperature, overnight. See experimental part for details.

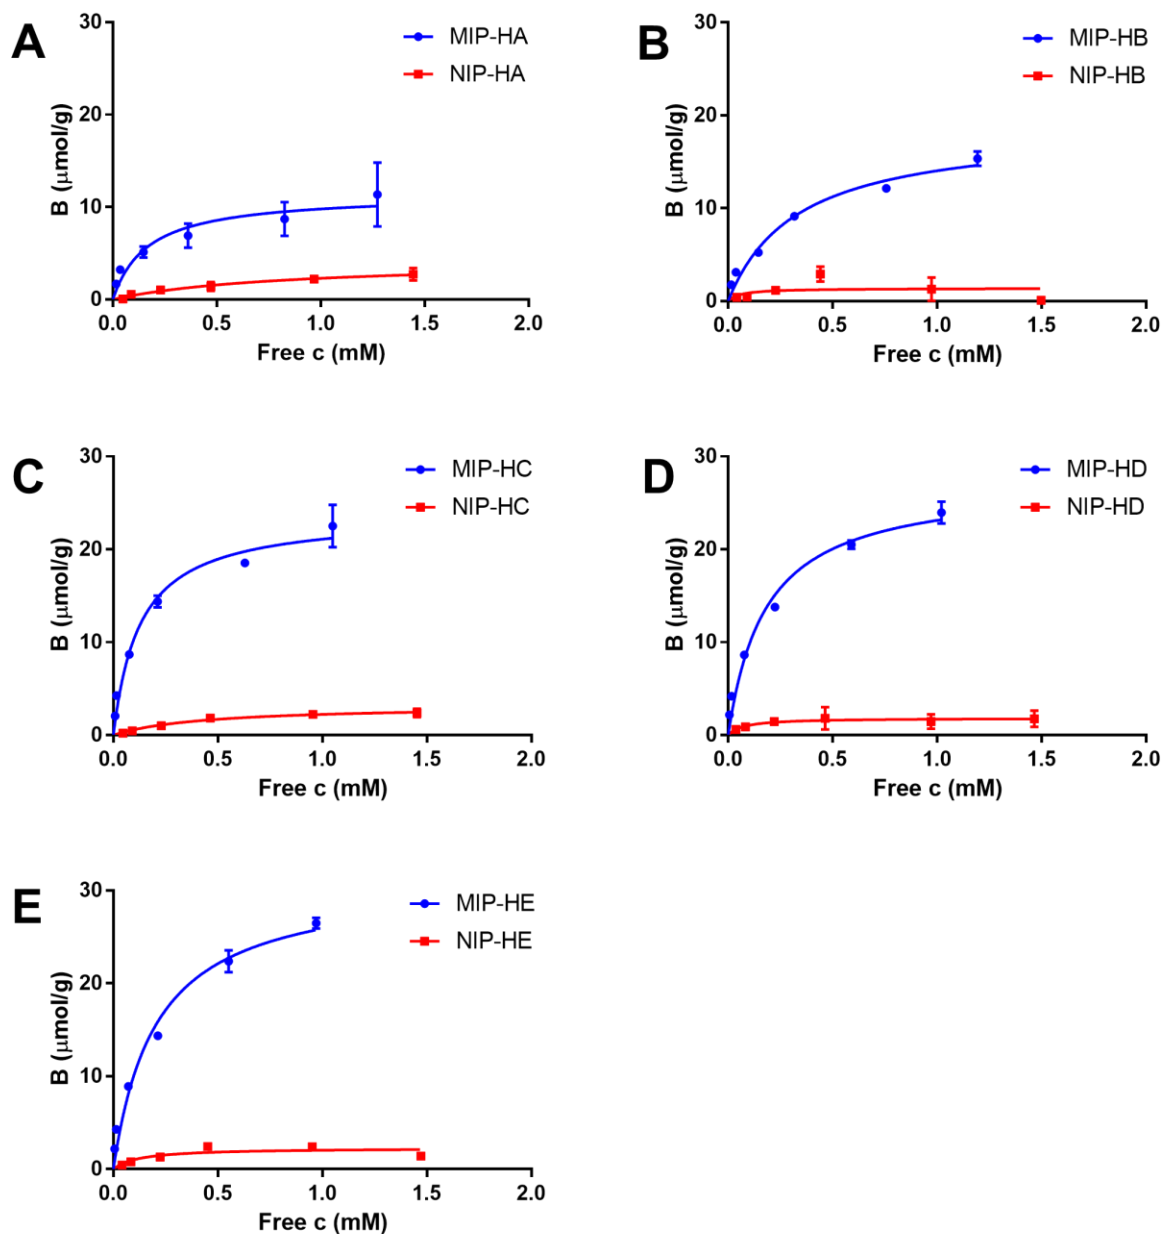

Figure S2. Binding isotherms of Fmoc-pTyr-OH (concentration range 0.05 mM-1.5 mM) for surface imprinted polymers and corresponding non-imprinted polymers. (A) MIP-HA/NIP-HA, (B) MIP-HB/NIP-HB, (C) MIP-HC/NIP-HC, (D) MIP-HD/NIP-HD, (E) MIP-HE/NIP-HE. Points show an average of three replicas with the error bars representing standard deviation.

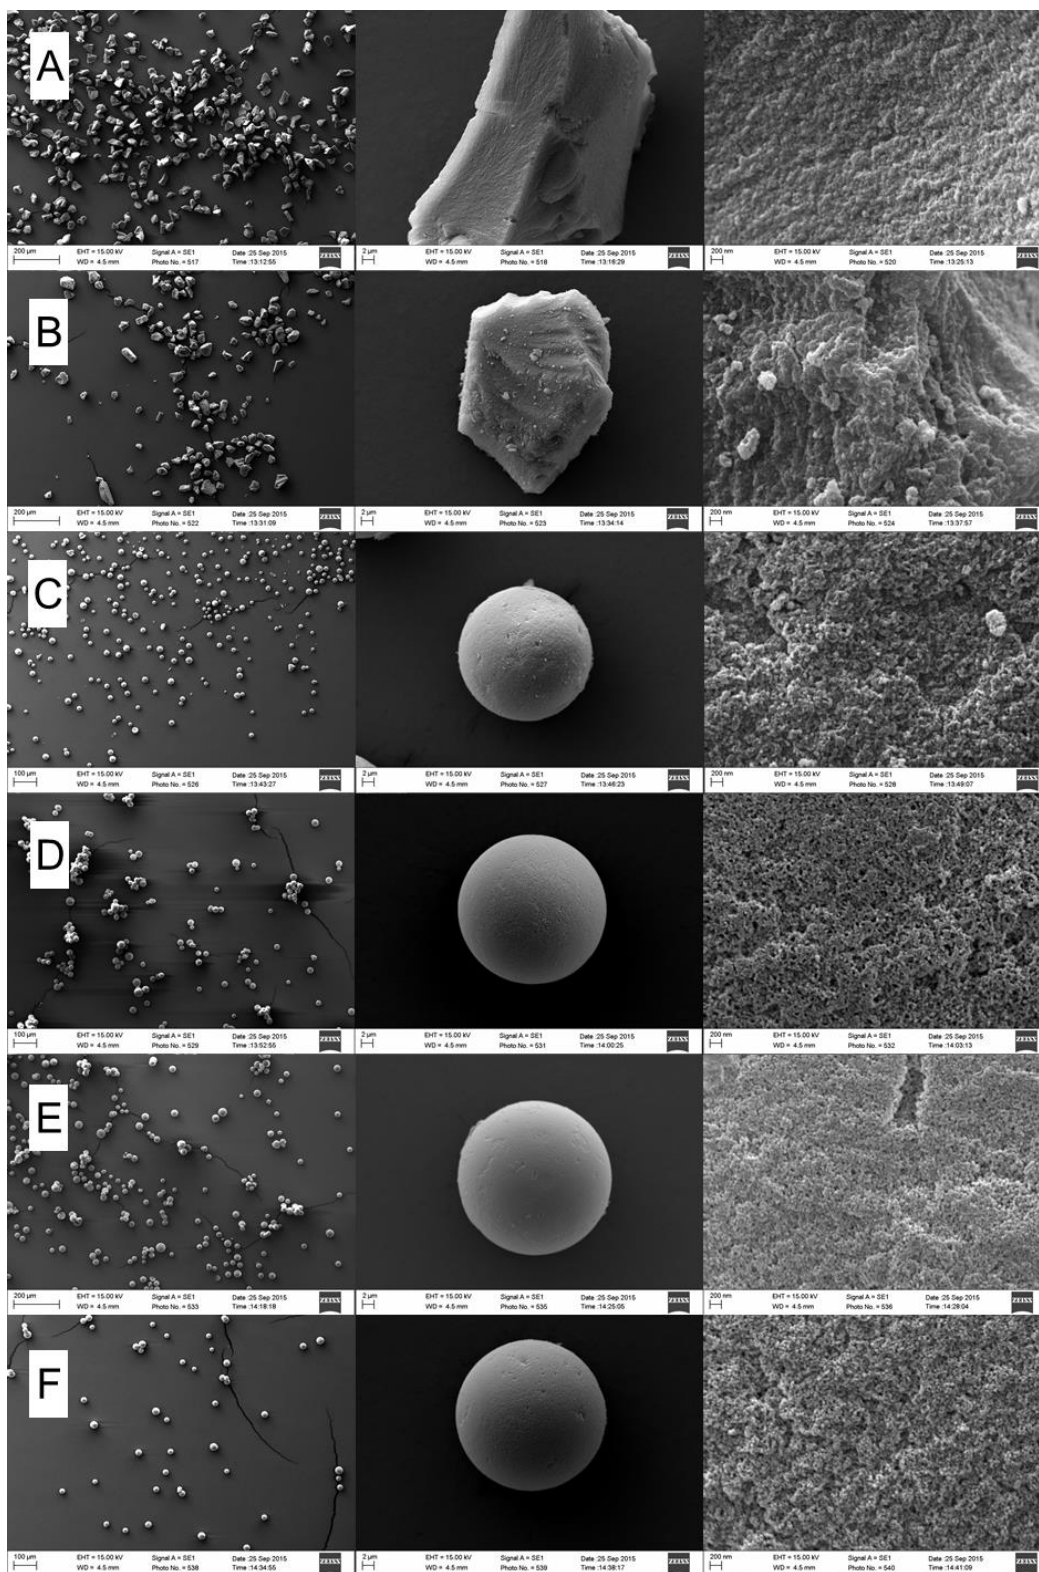

Figure S3. SEM images of (A) MIP-B, (B) NIP-B, (C) MIP-M, (D) NIP-M, (E) MIP-HE, and (F) NIP-HE at different magnifications.

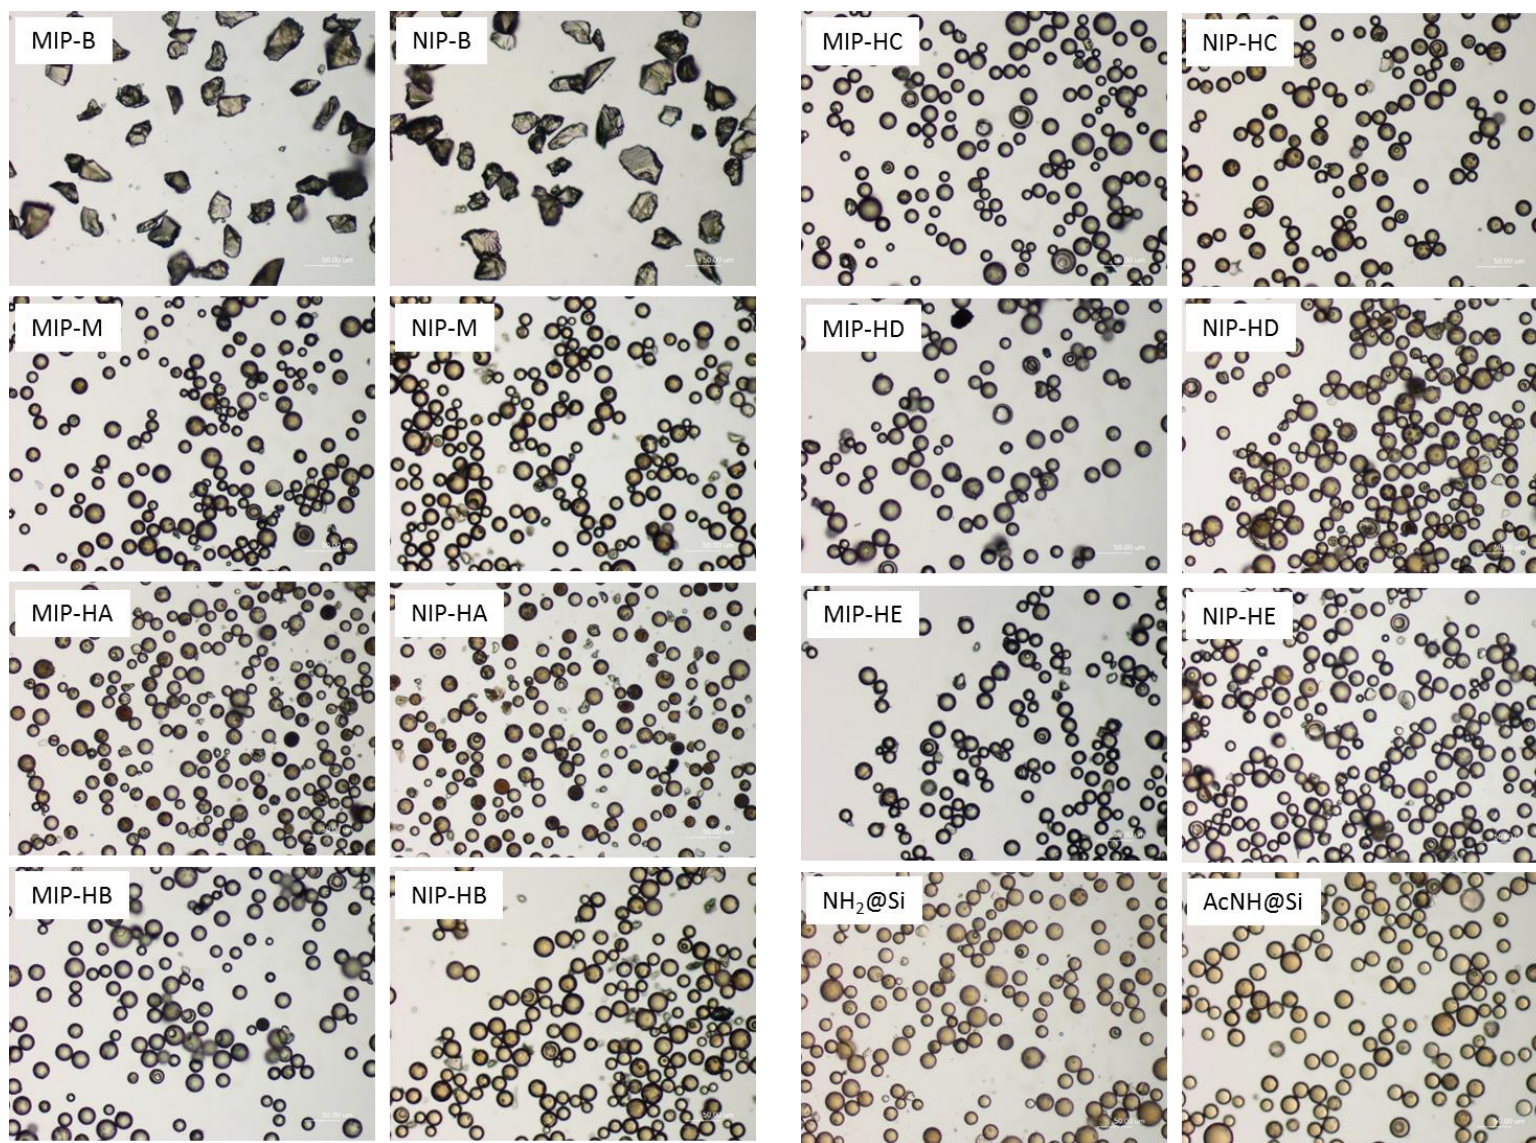

Figure S4. Optical micrographs of synthesized polymers and silica microparticles.

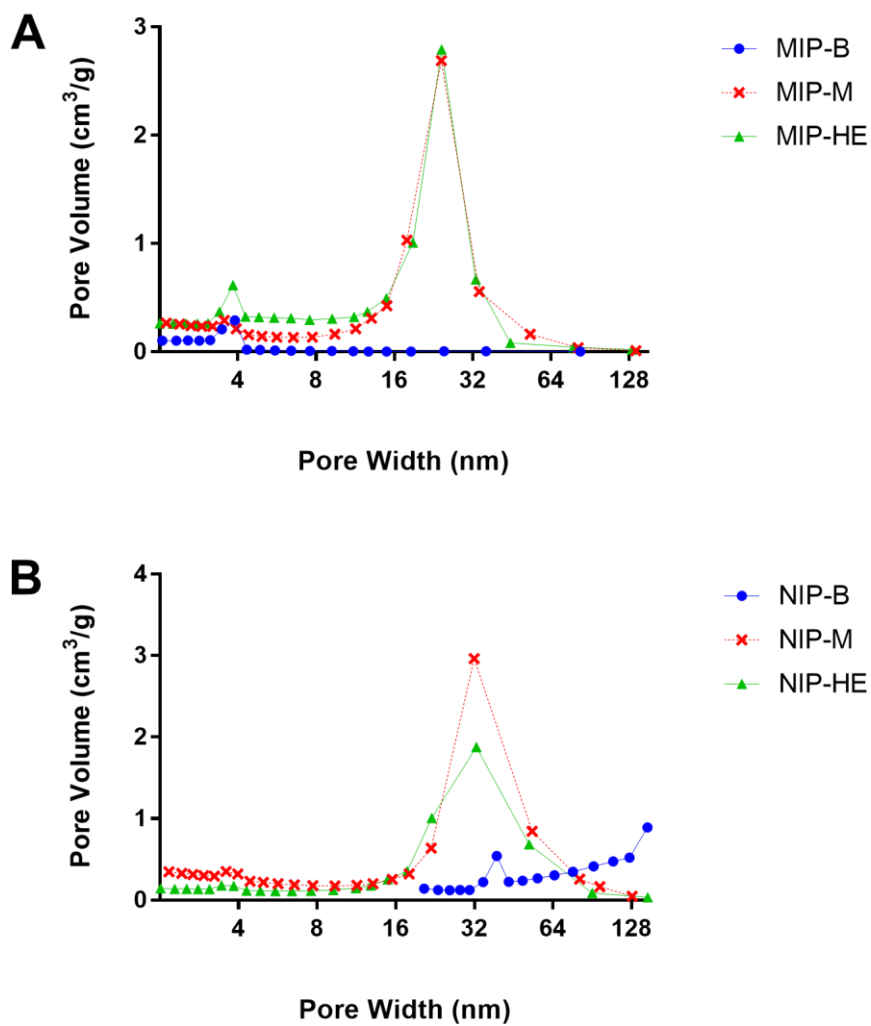

Figure S5. The BJH differential pore volume ( $dV/d\log(w)$ ) distribution plots against pore width for (A) MIP-B, MIP-M, MIP-HE and (B) NIP-B, NIP-M, NIP-HE.



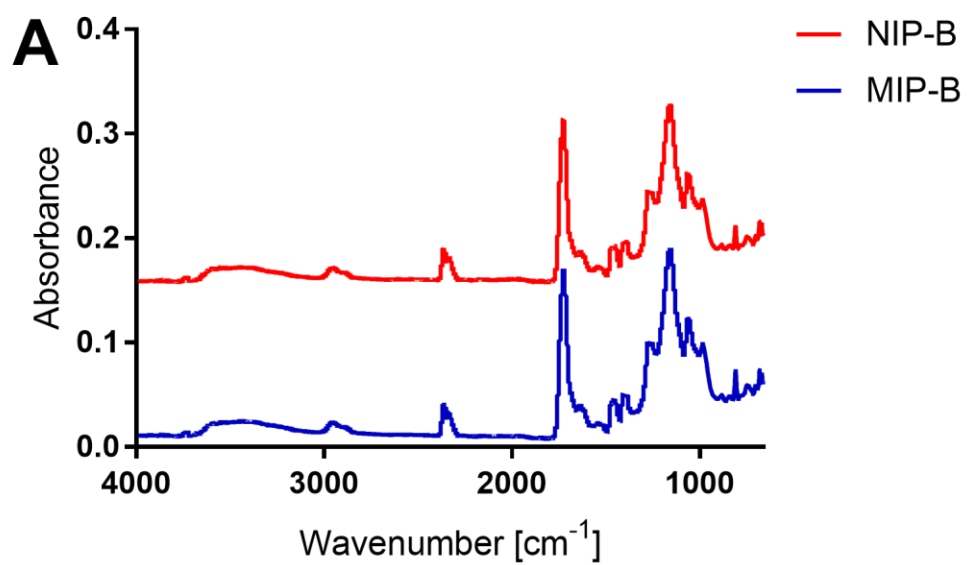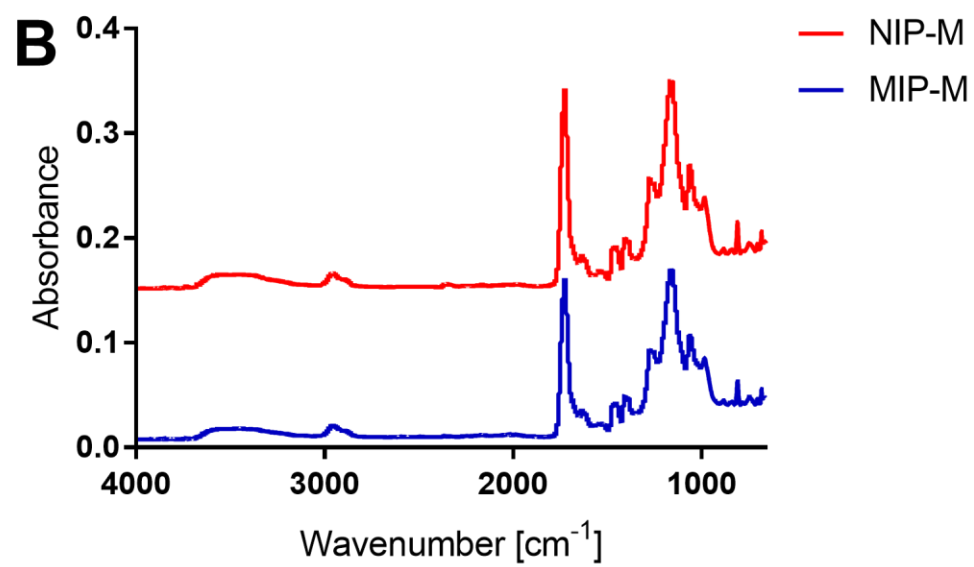

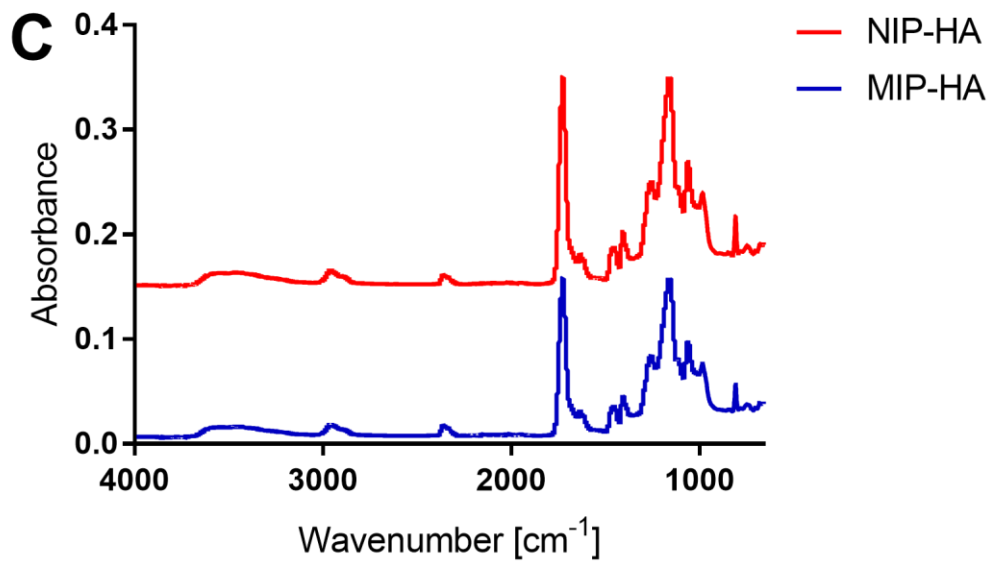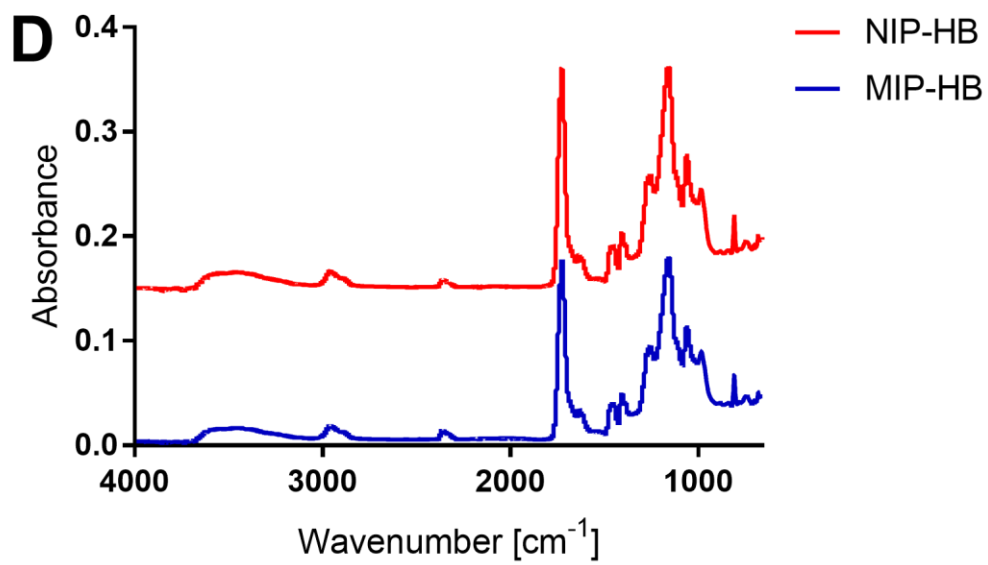



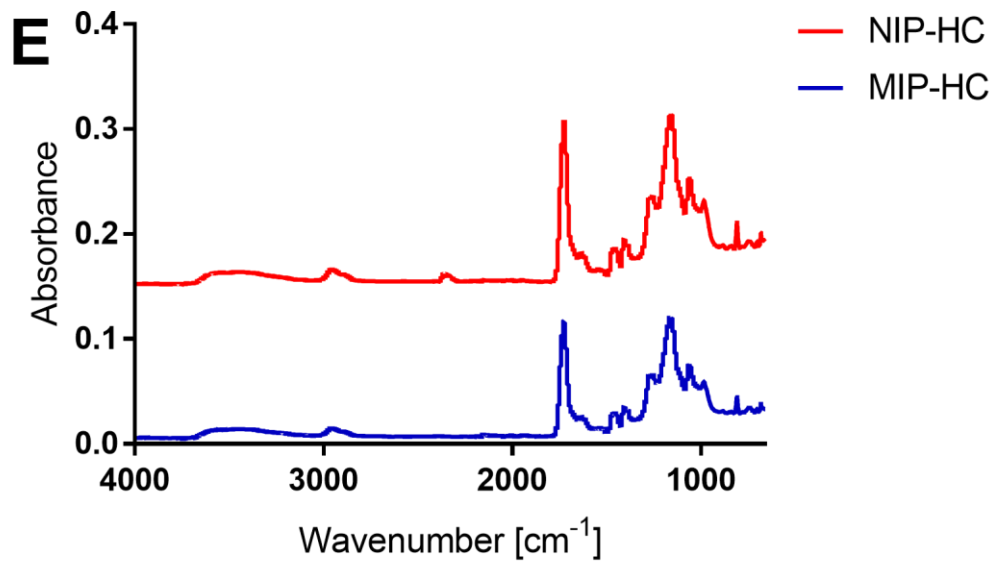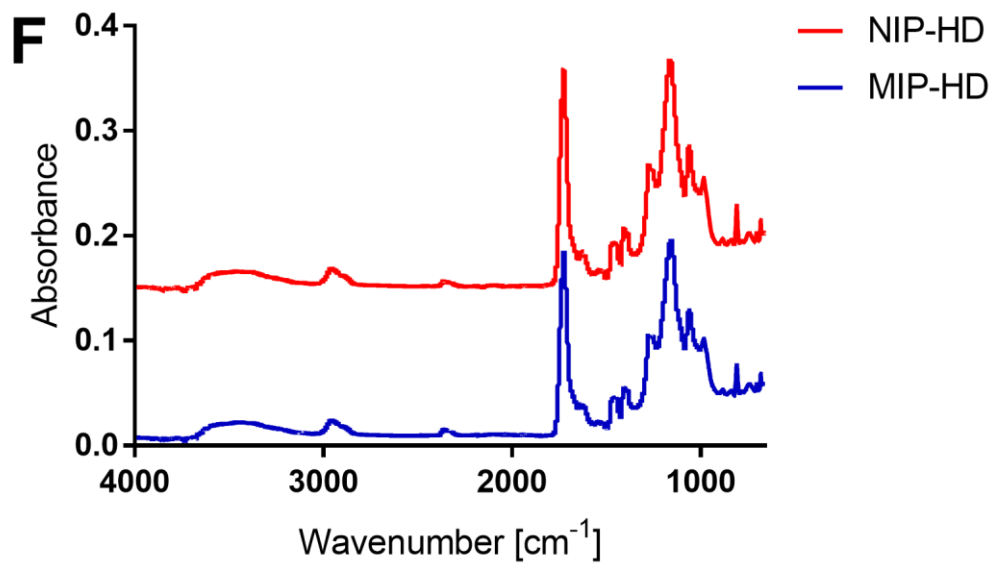

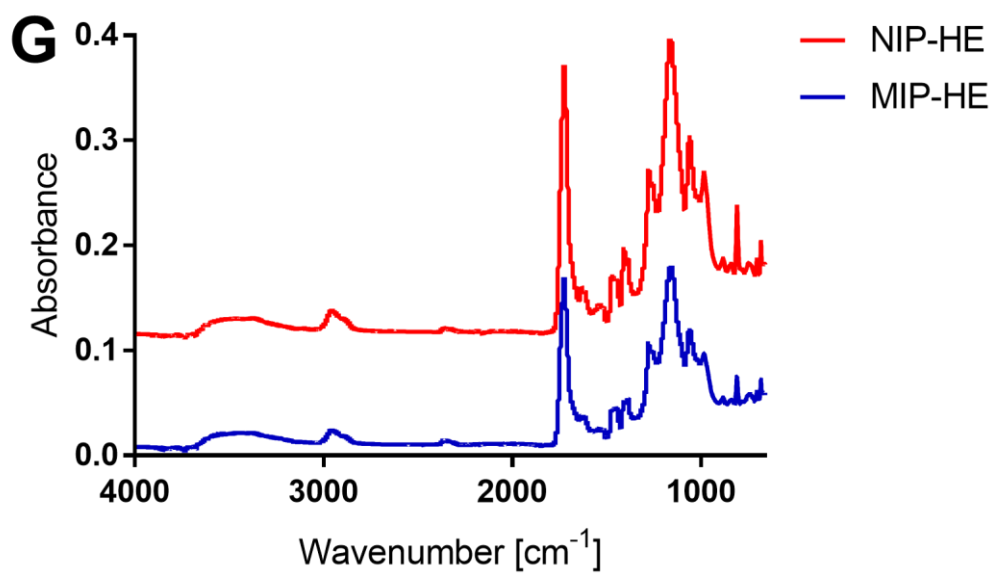

Figure S6. ATR-FTIR spectra of imprinted and non-imprinted polymers (A) MIP-B/NIP-B, (B) MIP-M/NIP-M, (C) MIP-HA/NIP-HA, (D) MIP-HB/NIP-HB, (E) MIP-HC/NIP-HC, (F) MIP-HD/NIP-HD, (G) MIP-HE/NIP-HE.

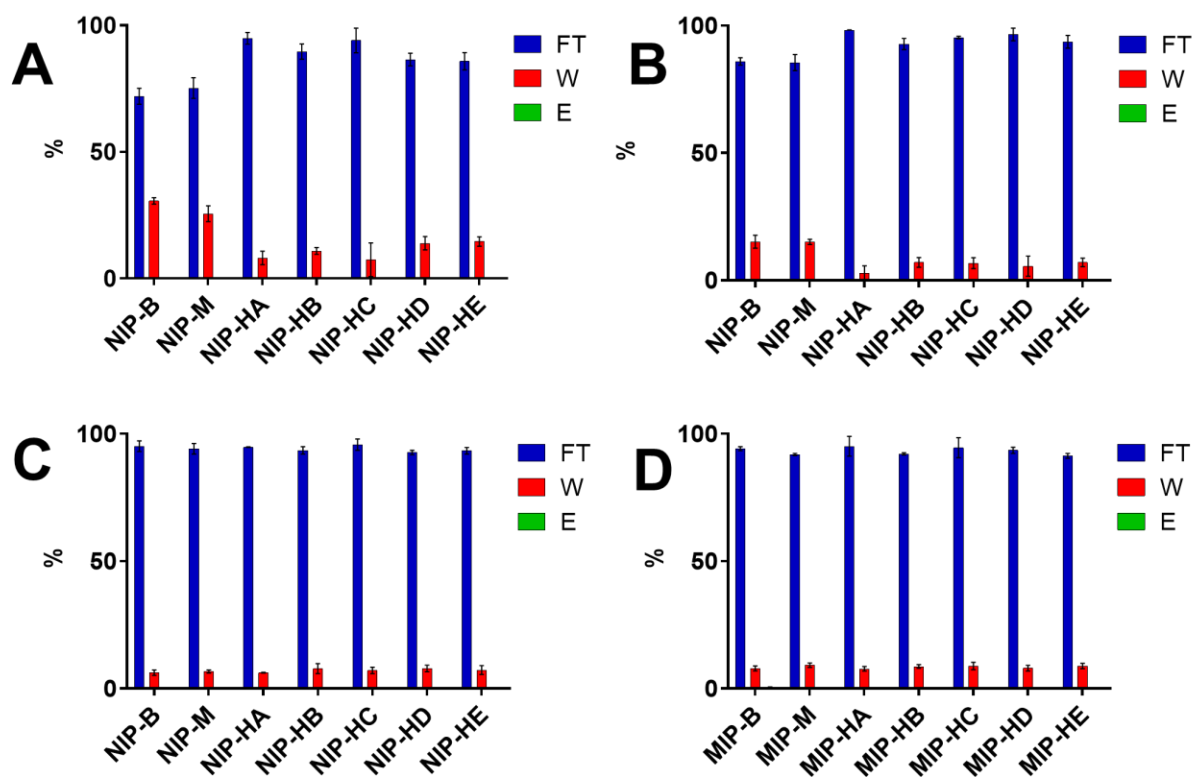

Figure S7. SPE test results Fmoc-pTyr-OH (A), and Fmoc-pSer-OH (B) and Fmoc-Tyr-OH (C, D) showing % of each analyte in flow through (FT), washing (W) and elution (E) fractions. The following conditions were applied: loading 95% ACN + 0.1% FA, washing 80% ACN + 0.1% FA, elution 80% MeOH + 1% TFA. The bars show the average of three replicas and the error bars represent standard deviation.

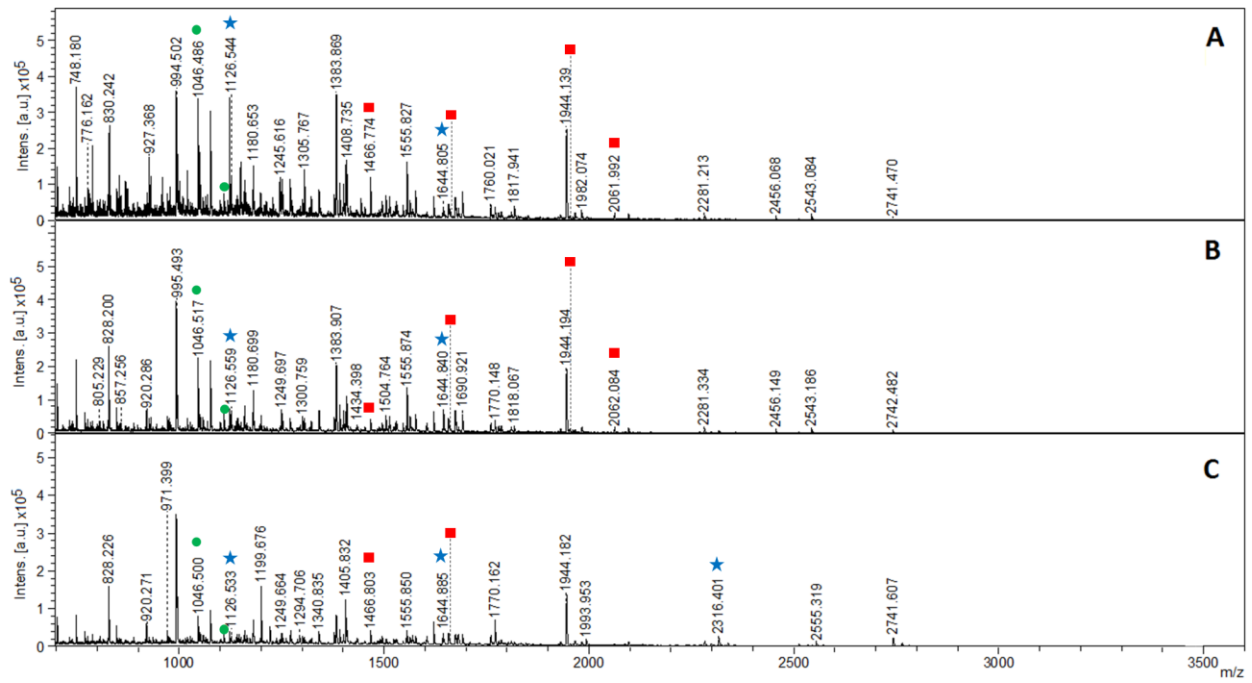

Figure S8. MALDI mass spectra obtained for combined flow through and washing fraction (FTW) from (A) MIP-B, (B) MIP-M and (C) MIP-HE. Marked are spiked phosphotyrosine peptides (asterisk), phosphoserine peptides (square) and spiked phosphoserine and non-phosphorylated peptides (circle).

Table S1. Characterization of silica with immobilized template.

| Sample         | Nominal template coverage      |                              | Real template coverage <sup>a</sup> |                              | Mass loss [%] <sup>b</sup> |
|----------------|--------------------------------|------------------------------|-------------------------------------|------------------------------|----------------------------|
|                | [ $\mu\text{mol}/\text{m}^2$ ] | [ $\mu\text{mol}/\text{g}$ ] | [ $\mu\text{mol}/\text{m}^2$ ]      | [ $\mu\text{mol}/\text{g}$ ] |                            |
| Fmoc-pTyr@Si-A | 0.44                           | 20                           | 0.23                                | 10                           | 3.1                        |
| Fmoc-pTyr@Si-B | 0.60                           | 2                            | 0.40                                | 18                           | 3.5                        |
| Fmoc-pTyr@Si-C | 0.76                           | 34                           | 0.73                                | 33                           | 3.8                        |
| Fmoc-pTyr@Si-D | 0.90                           | 40                           | 0.86                                | 39                           | 4.1                        |
| Fmoc-pTyr@Si-E | 1.20                           | 54                           | 1.22                                | 55                           | 4.5                        |

<sup>a</sup> Calculated by Fmoc-cleavage test; <sup>b</sup> Determined by thermogravimetric analysis.

Table S2. Characterization of polymeric materials.<sup>a</sup>

| Sample | Silica used for polymerization | Mass loss [%] <sup>a</sup> |
|--------|--------------------------------|----------------------------|
| MIP-B  | -                              | 94.3                       |
| NIP-B  | -                              | 94.4                       |
| MIP-M  | AcNH@Si                        | 93.9                       |
| NIP-M  | AcNH@Si                        | 93.1                       |
| MIP-HA | Fmoc-pTyr@Si-A                 | 94.9                       |
| NIP-HA | AcNH@Si                        | 94.7                       |
| MIP-HB | Fmoc-pTyr@Si-B                 | 94.2                       |
| NIP-HB | AcNH@Si                        | 94.9                       |
| MIP-HC | Fmoc-pTyr@Si-C                 | 93.2                       |
| NIP-HC | AcNH@Si                        | 94.4                       |
| MIP-HD | Fmoc-pTyr@Si-D                 | 93.5                       |
| NIP-HD | AcNH@Si                        | 95.6                       |
| MIP-HE | Fmoc-pTyr@Si-E                 | 95.2                       |
| NIP-HE | AcNH@Si                        | 97.3                       |

<sup>a</sup> The mass loss was determined by thermogravimetric analysis (TGA). The mass loss of the composites before etching was roughly 30%.

Table S3. Elemental composition of imprinted and non-imprinted polymers.<sup>a</sup>

| Polymer | Theoretical |      |      | Experimental |      |      |
|---------|-------------|------|------|--------------|------|------|
|         | %C          | %H   | %N   | % C          | % H  | % N  |
| MIP-B   | 56.30       | 5.91 | 1.06 | 56.36        | 5.80 | 0.98 |
| NIP-B   | 56.30       | 5.91 | 1.06 | 55.88        | 6.94 | 0.96 |
| MIP-M   | 56.30       | 5.91 | 1.06 | 56.28        | 6.89 | 0.99 |
| NIP-M   | 56.30       | 5.91 | 1.06 | 55.78        | 6.28 | 0.92 |
| MIP-HA  | 56.42       | 6.09 | 0.62 | 56.24        | 6.94 | 0.50 |
| NIP-HA  | 56.42       | 6.09 | 0.62 | 56.08        | 6.82 | 0.49 |
| MIP-HB  | 56.39       | 6.04 | 0.74 | 56.16        | 6.13 | 0.65 |
| NIP-HB  | 56.39       | 6.04 | 0.74 | 56.05        | 5.81 | 0.69 |
| MIP-HC  | 56.33       | 5.95 | 0.95 | 56.22        | 6.88 | 0.92 |
| NIP-HC  | 56.33       | 5.95 | 0.95 | 56.08        | 6.80 | 0.82 |
| MIP-HD  | 56.31       | 5.92 | 1.03 | 56.14        | 5.75 | 0.96 |
| NIP-HD  | 56.31       | 5.92 | 1.03 | 55.78        | 5.77 | 0.96 |
| MIP-HE  | 56.25       | 5.84 | 1.24 | 56.13        | 5.69 | 1.16 |
| NIP-HE  | 56.25       | 5.84 | 1.24 | 56.20        | 5.53 | 1.14 |

<sup>a</sup> The theoretical nitrogen content for polymers prepared in absence of urea monomer **1** was 0.47%.

Table S4. Binding constants ( $K_a$ ) maximum binding capacity ( $B_{max}$ ) and imprinting efficiency (IE) for MIPs and NIPs.

| Polymer | $K_a \times 10^3 [M^{-1}]$ | $B_{max} [\mu mol/g]$ | IE (%) |
|---------|----------------------------|-----------------------|--------|
| MIP-B   | $16.5 \pm 2.6$             | $25.0 \pm 1.0$        | 23     |
| MIP-M   | $16.7 \pm 2.3$             | $36.9 \pm 1.3$        | 33     |
| MIP-HA  | $5.9 \pm 2.6$              | $11.4 \pm 1.4$        | 36     |
| MIP-HB  | $3.0 \pm 0.9$              | $18.7 \pm 2.0$        | 33     |
| MIP-HC  | $7.8 \pm 1.9$              | $23.8 \pm 1.6$        | 23     |
| MIP-HD  | $5.5 \pm 1.4$              | $27.3 \pm 2.2$        | 22     |
| MIP-HE  | $4.8 \pm 1.3$              | $31.2 \pm 2.8$        | 18     |
| NIP-B   | $2.1 \pm 0.5$              | $7.8 \pm 0.7$         | -      |
| NIP-M   | $1.8 \pm 0.5$              | $6.5 \pm 0.7$         | -      |
| NIP-HA  | $1.2 \pm 0.3$              | $4.2 \pm 0.6$         | -      |
| NIP-HB  | $17.4 \pm 49$              | $1.4 \pm 0.8$         | -      |
| NIP-HC  | $2.2 \pm 0.5$              | $3.2 \pm 0.2$         | -      |
| NIP-HD  | $13.7 \pm 4.7$             | $1.8 \pm 0.1$         | -      |
| NIP-HE  | $8.2 \pm 6.9$              | $2.3 \pm 0.5$         | -      |

Table S5. Phosphotyrosine (pY), phosphoserine (pS) and spiked tyrosine (Y) peptides found in the sample before enrichment and in combined flow through and washing (FTW) and elution (E) fractions.<sup>a</sup>

| Peptide sequence                                       | [M+H] <sup>+</sup><br>(Da) | Origin             | Sample | MIP-B |     | MIP-M |   | MIP-HE |   |
|--------------------------------------------------------|----------------------------|--------------------|--------|-------|-----|-------|---|--------|---|
|                                                        |                            |                    |        | FTW   | E   | FTW   | E | FTW    | E |
| DRVYIHPF                                               | 1046.54                    | Spiked             | +      | +     | +   | +     | + | +      | + |
| DRV <b>p</b> SIHPF                                     | 1050.48                    | Spiked             | +      | -     | +   | -     | + | -      | + |
| GADDSYYTAR                                             | 1118.48                    | Spiked             | +      | +     | +/- | +     | + | +      | + |
| DRV <b>p</b> YIHPF                                     | 1126.51                    | Spiked             | +      | +     | +   | +     | + | +      | + |
| GADDSY <b>p</b> YTAR                                   | 1198.44                    | Spiked             | -      | -     | +   | -     | + | -      | + |
| GADDS <b>p</b> YpYTAR                                  | 1278.41                    | Spiked             | -      | -     | +/- | -     | + | -      | + |
| GSTAENA <b>p</b> YLR                                   | 1290.54                    | Spiked             | -      | -     | +   | -     | + | -      | + |
| TVDME <b>p</b> STEVFTK                                 | 1466.61                    | CASA2 <sup>b</sup> | +      | +     | +   | +     | + | +      | + |
| MHLPSPTDSN <b>p</b> YR                                 | 1644.69                    | Spiked             | +      | +     | +   | +     | + | +      | + |
| VPQLEIVPN <b>p</b> SAEER                               | 1660.79                    | CASA1 <sup>c</sup> | +      | +     | +   | +     | + | +      | + |
| DIG <b>p</b> SE <b>p</b> STEDQAMEDIK                   | 1927.69                    | CASA1 <sup>c</sup> | -      | -     | +   | -     | + | -      | + |
| YKVPQLEIVPN <b>p</b> SAEER                             | 1951.95                    | CASA1 <sup>c</sup> | +      | +     | +   | +     | + | +/-    | + |
| FQ <b>p</b> SEEQQTDELQDK                               | 2061.83                    | CASB <sup>d</sup>  | +      | +     | +   | +     | + | +/-    | + |
| GSHQISLDNPD <b>p</b> YQQDFPK                           | 2315.99                    | Spiked             | +      | +/-   | +   | +/-   | + | +      | + |
| RPAGSVQNPV <b>p</b> YHNQPLNPAPSRD                      | 2594.22                    | Spiked             | +      | -     | +   | -     | + | -      | + |
| YSSDPTGALTEDSIDDTFLPVPE <b>p</b> YINQSVPK <sup>e</sup> | 3478.58                    | Spiked             | +      | -     | +   | -     | + | +/-    | + |

<sup>a</sup> + = peptide signal found in the sample; - = peptide signal not found in the sample; +/- = peptide signal intensity below 9000 a. u. threshold limit; <sup>b</sup>  $\alpha$ -S2-Casein; <sup>c</sup>  $\alpha$ -S1-Casein; <sup>d</sup>  $\beta$ -Casein; <sup>e</sup> intensity threshold was 3000 a. u.



Table S6. Peak intensity analysis for samples before and after MIP enrichment.

| Peptide sequence                        | [M+H] <sup>+</sup> (Da) | Origin             | Intensity (a. u.) |        |         |         |
|-----------------------------------------|-------------------------|--------------------|-------------------|--------|---------|---------|
|                                         |                         |                    | Sample            | MIP-B  | MIP-M   | MIP-HE  |
| DRVYIHPF                                | 1046.54                 | Spiked             | 363213            | 43437  | 35139   | 31570   |
| DRV <b>p</b> SIHPF                      | 1050.48                 | Spiked             | 144086            | 43153  | 100226  | 95112   |
| GADDSYYTAR                              | 1118.48                 | Spiked             | 42264             | 5691   | 11240   | 13426   |
| DRV <b>p</b> YIHPF                      | 1126.51                 | Spiked             | 224855            | 99533  | 213266  | 223734  |
| GADDSY <b>p</b> YTAR                    | 1198.44                 | Spiked             | 0                 | 11759  | 371113  | 54946   |
| GADDS <b>p</b> Y <b>p</b> YTAR          | 1278.41                 | Spiked             | 0                 | 7799   | 21441   | 21148   |
| GSTAENA <b>p</b> YLR                    | 1290.54                 | Spiked             | 0                 | 24775  | 79378   | 97943   |
| TVDME <b>p</b> STEVFTK                  | 1466.61                 | CASA2 <sup>a</sup> | 125076            | 12472  | 19664   | 29531   |
| MHLPSPTDSN <b>p</b> YR                  | 1644.69                 | Spiked             | 207047            | 137941 | 281338  | 199752  |
| VPQLEIVPN <b>p</b> SAEER                | 1660.79                 | CASA1 <sup>b</sup> | 66293             | 47317  | 114561  | 124710  |
| DIG <b>p</b> SE <b>p</b> STEDQAMEDIK    | 1927.69                 | CASA1 <sup>b</sup> | 0                 | 9353   | 24299   | 24762   |
| YKVPQLEIVPN <b>p</b> SAEER              | 1951.95                 | CASA1 <sup>b</sup> | 169969            | 109210 | 267326  | 202206  |
| FQ <b>p</b> SEEQQQTEDELQDK              | 2061.83                 | CASB <sup>c</sup>  | 71904             | 60667  | 167517  | 123085  |
| GSHQISLDNPD <b>p</b> YQQDFPK            | 2315.99                 | Spiked             | 51887             | 34352  | 110974  | 65043   |
| RPAGSVQNPV <b>p</b> YHNQPLNPAPSRD       | 2594.22                 | Spiked             | 35786             | 27254  | 99005   | 60164   |
| YSSDPTGALTEDSIDDTFLPV <b>p</b> YINQSVPK | 3478.58                 | Spiked             | 3982              | 3078   | 8240    | 3641    |
| Total intensity of all peptides         |                         |                    | 1506362           | 677791 | 1924727 | 1370773 |
| Total intensity of pY peptides          |                         |                    | 523557            | 346491 | 1184755 | 726371  |
| Total intensity of pS peptides          |                         |                    | 577328            | 282172 | 693593  | 599406  |
| Total intensity of Y peptides           |                         |                    | 405477            | 49128  | 46379   | 44996   |
| % of pY peptides intensity              |                         |                    | 34.76             | 51.12  | 61.55   | 52.99   |
| % of pS peptides intensity              |                         |                    | 38.33             | 41.63  | 36.04   | 43.73   |
| % of Y peptides intensity               |                         |                    | 26.92             | 7.25   | 2.41    | 3.28    |
| Normalized pY/pS ratio                  |                         |                    | 0.91              | 1.35   | 1.88    | 1.34    |
| Normalized pY/Y ratio                   |                         |                    | 1.29              | 5.46   | 19.78   | 12.50   |

<sup>a</sup>  $\alpha$ -S2-Casein; <sup>b</sup>  $\alpha$ -S1-Casein; <sup>c</sup>  $\beta$ -Casein.
